# Supplementary material for: Risk Factors for COVID-19 Morbidity and Mortality in Institutionalised Elderly People
Source: Int J Environ Res Public Health. 2021 Sep 28;18(19):10221. doi: 10.3390/ijerph181910221 (PMC8507792; doi:10.3390/ijerph181910221)
Supplement: Supplementary file 1 [file ijerph-18-10221-s001.zip › ijerph-1319464-supplementary.pdf]

**Supplementary S1.** Chronic treatments and infection by SARS-CoV-2.

| PCR COVID-19                     |             |             |             |                  |         |
|----------------------------------|-------------|-------------|-------------|------------------|---------|
|                                  | [ALL]       | Negative    | Positive    | Odds ratio       | P value |
|                                  | N=784       | N=439       | N=345       |                  |         |
| ACE; ARB-II:                     |             |             |             |                  | 0.216   |
| No                               | 466 (59.4%) | 252 (54.1%) | 214 (45.9%) | Ref.             |         |
| Yes                              | 318 (40.6%) | 187 (58.8%) | 131 (41.2%) | 0.83 [0.62;1.10] |         |
| ANTIPSYCHOTICS:                  |             |             |             |                  | 0.917   |
| No                               | 454 (57.9%) | 253 (55.7%) | 201 (44.3%) | Ref.             |         |
| Yes                              | 330 (42.1%) | 186 (56.4%) | 144 (43.6%) | 0.97 [0.73;1.30] |         |
| ANTIDEPRESSANTS:                 |             |             |             |                  | 0.515   |
| No                               | 400 (51.0%) | 229 (57.2%) | 171 (42.8%) | Ref.             |         |
| Yes                              | 384 (49.0%) | 210 (54.7%) | 174 (45.3%) | 1.11 [0.84;1.47] |         |
| ANTICHOLINERGICS:                |             |             |             |                  | 0.222   |
| No                               | 763 (97.3%) | 424 (55.6%) | 339 (44.4%) | Ref.             |         |
| Yes                              | 21 (2.68%)  | 15 (71.4%)  | 6 (28.6%)   | 0.51 [0.18;1.28] |         |
| GABAERGICS:                      |             |             |             |                  | 0.435   |
| No                               | 758 (96.7%) | 422 (55.7%) | 336 (44.3%) | Ref.             |         |
| Yes                              | 26 (3.32%)  | 17 (65.4%)  | 9 (34.6%)   | 0.67 [0.28;1.50] |         |
| PROTON PUMP INHIBITORS           |             |             |             |                  | 0.629   |
| No                               | 398 (50.8%) | 219 (55.0%) | 179 (45.0%) | Ref.             |         |
| Yes                              | 386 (49.2%) | 220 (57.0%) | 166 (43.0%) | 0.92 [0.70;1.22] |         |
| NON-STEROIDAL ANTI-INFLAMATORIES |             |             |             |                  | 0.347   |
| No                               | 757 (96.6%) | 421 (55.6%) | 336 (44.4%) | Ref.             |         |
| Yes                              | 27 (3.44%)  | 18 (66.7%)  | 9 (33.3%)   | 0.63 [0.27;1.40] |         |
| BENZODIAZEPINES:                 |             |             |             |                  | 0.685   |
| No                               | 471 (60.1%) | 267 (56.7%) | 204 (43.3%) | Ref.             |         |
| Yes                              | 313 (39.9%) | 172 (55.0%) | 141 (45.0%) | 1.07 [0.80;1.43] |         |
| ANTIDIABETICS:                   |             |             |             |                  | 0.955   |
| No                               | 654 (83.4%) | 367 (56.1%) | 287 (43.9%) | Ref.             |         |
| Yes                              | 130 (16.6%) | 72 (55.4%)  | 58 (44.6%)  | 1.03 [0.70;1.50] |         |
| STATINS:                         |             |             |             |                  | 0.097   |
| No                               | 604 (77.0%) | 328 (54.3%) | 276 (45.7%) | Ref.             |         |

|                    |             |                |                |                  |       |
|--------------------|-------------|----------------|----------------|------------------|-------|
| Yes                | 180 (23.0%) | 111<br>(61.7%) | 69 (38.3%)     | 0.74 [0.52;1.04] |       |
| INHALERS:          |             |                |                |                  | 0.890 |
| No                 | 664 (84.7%) | 373<br>(56.2%) | 291<br>(43.8%) | Ref.             |       |
| Yes                | 120 (15.3%) | 66 (55.0%)     | 54 (45.0%)     | 1.05 [0.71;1.55] |       |
| LEVODOPA:          |             |                |                |                  | 0.222 |
| No                 | 763 (97.3%) | 424<br>(55.6%) | 339<br>(44.4%) | Ref.             |       |
| Yes                | 21 (2.68%)  | 15 (71.4%)     | 6 (28.6%)      | 0.51 [0.18;1.28] |       |
| LEVOTHYROXINE      |             |                |                |                  | 0.739 |
| No                 | 702 (89.5%) | 395<br>(56.3%) | 307<br>(43.7%) | Ref.             |       |
| Yes                | 82 (10.5%)  | 44 (53.7%)     | 38 (46.3%)     | 1.11 [0.70;1.76] |       |
| OPIOIDS            |             |                |                |                  | 0.401 |
| No                 | 676 (86.2%) | 374<br>(55.3%) | 302<br>(44.7%) | Ref.             |       |
| Yes                | 108 (13.8%) | 65 (60.2%)     | 43 (39.8%)     | 0.82 [0.54;1.24] |       |
| ANTIHYPERTENSIVES: |             |                |                |                  | 0.021 |
| No                 | 260 (33.2%) | 130<br>(50.0%) | 130<br>(50.0%) | Ref.             |       |
| Yes                | 524 (66.8%) | 309<br>(59.0%) | 215<br>(41.0%) | 0.70 [0.52;0.94] |       |

**Supplementary S2. Chronic drugs and mortality by SARS-CoV-2.**

|                                          | [ALL]       | No exitus      | Exitus        | Odds ratio       | P value |
|------------------------------------------|-------------|----------------|---------------|------------------|---------|
|                                          | N=345       | N=258          | N=87          |                  |         |
| ACE_ARB-II:                              |             |                |               |                  | 1.000   |
| No                                       | 214 (62.0%) | 160<br>(74.8%) | 54<br>(25.2%) | Ref.             |         |
| Yes                                      | 131 (38.0%) | 98 (74.8%)     | 33<br>(25.2%) | 1.00 [0.60;1.64] |         |
| ANTIPSYCHOTICS                           |             |                |               |                  | 0.293   |
| No                                       | 201 (58.3%) | 155<br>(77.1%) | 46<br>(22.9%) | Ref.             |         |
| Yes                                      | 144 (41.7%) | 103<br>(71.5%) | 41<br>(28.5%) | 1.34 [0.82;2.19] |         |
| ANTIDEPRESSANTS                          |             |                |               |                  | 0.733   |
| No                                       | 171 (49.6%) | 126<br>(73.7%) | 45<br>(26.3%) | Ref.             |         |
| Yes                                      | 174 (50.4%) | 132<br>(75.9%) | 42<br>(24.1%) | 0.89 [0.55;1.45] |         |
| ANTICHOLINERGICS:                        |             |                |               |                  | 0.171   |
| No                                       | 339 (98.3%) | 255<br>(75.2%) | 84<br>(24.8%) | Ref.             |         |
| Yes                                      | 6 (1.74%)   | 3 (50.0%)      | 3 (50.0%)     | 3.02 [0.51;17.9] |         |
| GABAERGICS:                              |             |                |               |                  | 0.459   |
| No                                       | 336 (97.4%) | 250<br>(74.4%) | 86<br>(25.6%) | Ref.             |         |
| Yes                                      | 9 (2.61%)   | 8 (88.9%)      | 1 (11.1%)     | 0.41 [0.02;2.32] |         |
| PROTON PUMP<br>INHIBITORS                |             |                |               |                  | 0.099   |
| No                                       | 179 (51.9%) | 141<br>(78.8%) | 38<br>(21.2%) | Ref.             |         |
| Yes                                      | 166 (48.1%) | 117<br>(70.5%) | 49<br>(29.5%) | 1.55 [0.95;2.54] |         |
| NON-STEROIDAL<br>ANTI-<br>INFLAMMATORIES |             |                |               |                  | 0.238   |
| No                                       | 336 (97.4%) | 253<br>(75.3%) | 83<br>(24.7%) | Ref.             |         |
| Yes                                      | 9 (2.61%)   | 5 (55.6%)      | 4 (44.4%)     | 2.45 [0.57;9.82] |         |
| BENZODIAZEPINES:                         |             |                |               |                  | 0.127   |
| No                                       | 204 (59.1%) | 146<br>(71.6%) | 58<br>(28.4%) | Ref.             |         |
| Yes                                      | 141 (40.9%) | 112<br>(79.4%) | 29<br>(20.6%) | 0.65 [0.39;1.08] |         |
| ANTIDIABETICS:                           |             |                |               |                  | 0.089   |
| No                                       | 287 (83.2%) | 209<br>(72.8%) | 78<br>(27.2%) | Ref.             |         |
| Yes                                      | 58 (16.8%)  | 49 (84.5%)     | 9 (15.5%)     | 0.50 [0.22;1.02] |         |
| STATINS:                                 |             |                |               |                  | 0.337   |
| No                                       | 276 (80.0%) | 210<br>(76.1%) | 66<br>(23.9%) | Ref.             |         |
| Yes                                      | 69 (20.0%)  | 48 (69.6%)     | 21<br>(30.4%) | 1.39 [0.77;2.48] |         |

|                   |             |                |               |                  |       |
|-------------------|-------------|----------------|---------------|------------------|-------|
| INHALERS:         |             |                |               |                  | 0.521 |
| No                | 291 (84.3%) | 220<br>(75.6%) | 71<br>(24.4%) | Ref.             |       |
| Yes               | 54 (15.7%)  | 38 (70.4%)     | 16<br>(29.6%) | 1.31 [0.67;2.46] |       |
| LEVODOPA:         |             |                |               |                  | 0.171 |
| No                | 339 (98.3%) | 255<br>(75.2%) | 84<br>(24.8%) | Ref.             |       |
| Yes               | 6 (1.74%)   | 3 (50.0%)      | 3 (50.0%)     | 3.02 [0.51;17.9] |       |
| LEVOTHYROXINE     |             |                |               |                  | 0.974 |
| No                | 307 (89.0%) | 229<br>(74.6%) | 78<br>(25.4%) | Ref.             |       |
| Yes               | 38 (11.0%)  | 29 (76.3%)     | 9 (23.7%)     | 0.92 [0.39;1.97] |       |
| OPIOIDS           |             |                |               |                  | 0.210 |
| No                | 302 (87.5%) | 222<br>(73.5%) | 80<br>(26.5%) | Ref.             |       |
| Yes               | 43 (12.5%)  | 36 (83.7%)     | 7 (16.3%)     | 0.55 [0.21;1.22] |       |
| ANTIHYPERTENSIVES |             |                |               |                  | 1.000 |
| No                | 130 (37.7%) | 97 (74.6%)     | 33<br>(25.4%) | Ref.             |       |
| Yes               | 215 (62.3%) | 161<br>(74.9%) | 54<br>(25.1%) | 0.98 [0.60;1.64] |       |

**Supplementary S3.** Acute treatment and mortality by SARS-CoV-2.

|                           | [ALL]       | No exitus   | Exitus     | Odd ratio           | P value |
|---------------------------|-------------|-------------|------------|---------------------|---------|
|                           | N=345       | N=258       | N=87       |                     |         |
| TREATMENT WITH CORTICOIDS |             |             |            |                     | 0.181   |
| No                        | 284 (82.3%) | 217 (76.4%) | 67 (23.6%) | Ref.                |         |
| Yes                       | 61 (17.7%)  | 41 (67.2%)  | 20 (32.8%) | 1.58<br>[0.85;2.87] |         |
| TYPES OF CORTICOIDS:      |             |             |            |                     | 0.227   |
| Prednisone                | 13 (21.3%)  | 11 (84.6%)  | 2 (15.4%)  | Ref.                |         |
| Methylprednisolone        | 46 (75.4%)  | 28 (60.9%)  | 18 (39.1%) | . [∴]               |         |
| Dexametasone              | 2 (3.28%)   | 2 (100%)    | 0 (0.00%)  | . [∴]               |         |
